# Supplementary material for: Lipase Activity: The Effect of Macromolecules on Structural Transitions and Lipolysis kinetics
Source: Research Square preprint supplement (doi:10.21203/rs.3.rs-7509188/v1), 2025-09-08
Supplement: Supplementary file 1 [file 11e25bd2590110a25abe44f8.docx]

**Supporting information:**

**Lipase Activity: The Effect of Macromolecules on Structural Transitions and Lipolysis kinetics**

Lei Wang1, Pan-Pan Chen1, Biao Wang1, Mi-Zhuan Li1,3, Yan Cheng2, li Zhang4*, Zhong-Xiu Chen1*

1. *Molecular Food Science Laboratory, College of Food & Biology Engineering, Zhejiang Gongshang University, Hangzhou, 310018, China*
2. *School of Economics, Zhejiang Gongshang University, Hangzhou 310018, China*

**Corresponding author：**Zhong-Xiu Chen, email: zhxchen@zjgsu.edu.cn

**Address:** Molecular Food Science Laboratory, College of Food & Biology Engineering, Zhejiang Gongshang University, Hangzhou, Zhejiang 310035, China.

Tel: 86-571-28008980

Fax: 86-571-28008900

**Table S1.** *Kinetics parameters of urea-induced PPL unfolding in macromolecular media*

|  | Concentration (mol/L) | Unfolding Rate Constantk（s-1） | | | Transition State Free Energy ΔG‡（kJ·mol-1） | | |
| --- | --- | --- | --- | --- | --- | --- | --- |
| ***k1*** | ***k2*** | ***k3*** | **ΔG ‡ 1** | **ΔG ‡ 2** | **ΔG ‡ 3** |
| **Buffer** | 2 | 0.257 | 0.050 |  | 79.527 | 83.751 |  |
| 4 | 0.644 | 0.155 |  | 77.158 | 80.829 |  |
| 6 | 1.036 | 0.252 |  | 75.931 | 79.578 |  |
| 8 | 1.534 | 0.351 |  | 74.920 | 78.723 |  |
| **PEG 2000** | 2 | 0.146 | 0.029 |  | 80.982 | 85.130 |  |
| 4 | 0.380 | 0.088 |  | 78.514 | 82.298 |  |
| 6 | 0.744 | 0.154 |  | 76.783 | 80.844 |  |
| 8 | 1.112 | 0.241 |  | 75.749 | 79.692 |  |
| **PEG4000** | 2 | 0.082 | 0.026 |  | 82.456 | 85.429 |  |
| 4 | 0.216 | 0.058 |  | 79.972 | 83.343 |  |
| 6 | 0.336 | 0.107 |  | 78.834 | 81.778 |  |
| 8 | 0.497 | 0.157 |  | 77.824 | 80.791 |  |
| **PEG6000** | 2 | 0.062 | 0.025 |  | 83.173 | 85.510 |  |
| 4 | 0.101 | 0.043 |  | 81.937 | 84.120 |  |
| 6 | 0.143 | 0.066 |  | 81.039 | 83.028 |  |
| 8 | 0.198 | 0.092 |  | 80.197 | 82.161 |  |
| **PEG8000** | 2 | 0.055 | 0.018 |  | 83.489 | 86.377 |  |
| 4 | 0.092 | 0.035 |  | 82.183 | 84.648 |  |
| 6 | 0.126 | 0.063 |  | 81.353 | 83.140 |  |
| 8 | 0.185 | 0.091 |  | 80.374 | 82.206 |  |
| **PEG20000** | 2 | 0.055 | 0.007 |  | 83.489 | 88.886 |  |
| 4 | 0.086 | 0.020 |  | 82.358 | 86.054 |  |
| 6 | 0.102 | 0.050 |  | 81.896 | 83.723 |  |
| 8 | 0.131 | 0.070 |  | 81.265 | 82.862 |  |
| **Dextran 20** | 2 | 0.687 | 0.228 |  | 76.991 | 79.834 |  |
| 4 | 0.982 | 0.477 |  | 76.069 | 77.932 |  |
| 6 | 1.578 | 0.564 |  | 74.848 | 77.500 |  |
| 8 | 2.249 | 0.820 |  | 73.933 | 76.534 |  |
| **Dextran 70** | 2 | 0.270 | 0.074 |  | 79.401 | 82.738 |  |
| 4 | 0.624 | 0.275 |  | 77.239 | 79.352 |  |
| 6 | 0.965 | 0.391 |  | 76.115 | 78.442 |  |
| 8 | 1.678 | 0.737 |  | 74.688 | 76.808 |  |
| **Dextran 200** | 2 | 0.196 | 0.088 |  | 80.229 | 82.299 |  |
| 4 | 0.330 | 0.197 |  | 78.882 | 80.205 |  |
| 6 | 0.676 | 0.426 |  | 77.032 | 78.223 |  |
| 8 | 0.833 | 0.659 |  | 76.493 | 77.097 |  |
| **Ficoll 70** | 2 | 4.466 | 1.670 | 0.318 | 72.165 | 74.701 | 78.975 |
| 4 | 4.585 | 1.711 | 0.303 | 72.098 | 74.639 | 79.102 |
| 6 | 4.667 | 1.823 | 0.308 | 72.052 | 74.475 | 79.055 |
| 8 | 4.716 | 1.909 | 0.291 | 72.025 | 74.356 | 79.208 |
| **Ficoll 400** | 2 | 2.853 |  |  | 73.321 |  |  |
| 4 | 2.952 |  |  | 73.232 |  |  |
| 6 | 3.163 |  |  | 73.055 |  |  |
| 8 | 3.264 |  |  | 72.973 |  |  |
| **PL(F-108)** | 2 | 0.303 | 0.092 |  | 79.100 | 82.161 |  |
| 4 | 0.395 | 0.155 |  | 78.414 | 80.830 |  |
| 6 | 0.492 | 0.237 |  | 77.850 | 79.735 |  |
| 8 | 0.674 | 0.295 |  | 77.038 | 79.168 |  |
| **PL(L-35)** | 2 | 0.130 | 0.045 |  | 81.277 | 84.027 |  |
| 4 | 0.224 | 0.066 |  | 79.879 | 82.375 |  |
| 6 | 0.328 | 0.085 |  | 78.898 | 83.046 |  |
| 8 | 0.425 | 0.129 |  | 78.227 | 81.300 |  |
| **PL(L-64)** | 2 | 0.123 |  |  | 81.422 |  |  |
| 4 | 0.220 |  |  | 79.921 |  |  |
| 6 | 0.318 |  |  | 78.972 |  |  |
| 8 | 0.370 |  |  | 78.587 |  |  |
| **PL(P-123)** | 2 | 0.129 |  |  | 81.296 |  |  |
| 4 | 0.145 |  |  | 81.006 |  |  |
| 6 | 0.186 |  |  | 80.356 |  |  |
| 8 | 0.211 |  |  | 80.036 |  |  |

**Table S2.** Characteristic parameters of the PPL unfolding process

|  | Conformational  transitions | τ (L·mol-1 ) | *m* | Regression  equation | R2 |
| --- | --- | --- | --- | --- | --- |
| Buffer | N⇄I | 0.049 | 1.271 | y = 1.271x - 3.010 | 0.996 |
| I⇄U | 0.363 | 0.989 | y = 0.989x - 1.015 | 0.998 |
| PEG 2000 | N⇄I | 0.380 | 0.655 | y = 0.655x - 0.969 | 0.994 |
| I⇄U | 0.126 | 1.281 | y = 1.281x - 2.074 | 0.999 |
| PEG 4000 | N⇄I | 0.199 | 0.609 | y = 0.609x - 1.614 | 0.997 |
| I⇄U | 0.020 | 2.502 | y = 2.502x - 3.899 | 0.980 |
| PEG 6000 | N⇄I | 0.134 | 0.726 | y = 0.726x - 2.009 | 0.998 |
| I⇄U | 0.048 | 2.163 | y = 2.163x - 3.029 | 0.991 |
| PEG 8000 | N⇄I | 0.270 | 0.603 | y = 0.603x - 1.308 | 0.998 |
| I⇄U | 0.030 | 2.159 | y = 2.159x - 3.497 | 0.995 |
| PEG 20000 | N⇄I | 0.379 | 0.417 | y = 0.417x - 0.971 | 0.998 |
| I⇄U | 0.012 | 2.689 | y = 2.689x - 4.439 | 0.998 |
| Dextran20 | N⇄I | 0.181 | 0.871 | y = 0.8708x - 1.7095 | 0.991 |
| I⇄U | 0.120 | 1.327 | y = 1.3267x - 2.1173 | 0.989 |
| Dextran70 | N⇄I | 0.022 | 2.030 | y = 2.0299x - 3.8073 | 0.999 |
| I⇄U | 0.079 | 1.445 | y = 1.4446x - 2.5422 | 0.987 |
| Dextran200 | N⇄I | 0.172 | 0.928 | y = 0.9284x - 1.7586 | 0.988 |
| I⇄U | 0.006 | 2.784 | y = 2.7839x - 5.1795 | 0.999 |
| Ficoll70 | N⇄I1 | 0.044 | 1.742 | y = 1.7422x - 3.1154 | 0.995 |
| I1⇄I2 | 0.014 | 2.541 | y = 2.541x - 4.2955 | 0.993 |
| I2⇄U | 0.004 | 0.450 | y = 0.4497x - 5.6117 | 0.992 |
| Ficoll400 | N⇄U | 0.115 | 1.205 | y = 1.2045x - 2.1662 | 0.993 |
| PL(L-35) | N⇄I | 0.018 | 1.798 | y = 1.7975x - 3.92 | 0.996 |
| I⇄U | 0.131 | 0.594 | y = 0.5569x - 1.952 | 0.985 |
| PL(F-108) | N⇄I | 0.033 | 1.334 | y = 1.3343x - 3.408 | 0.996 |
| I⇄U | 0.041 | 1.109 | y = 1.0674x - 3.104 | 0.983 |
| PL(P-123) | N⇄U | 0.095 | 1.302 | y = 1.302x - 2.3492 | 0.960 |
| PL(L-64) | N⇄U | 0.006 | 2.578 | y = 2.5776x - 5.1359 | 0.966 |

**Table S3.** The distribution of stable conformational states in the process of PPL unfolding

|  | [D]Urea（mol/L） | *fu* | *fi2* | *fi1* | *fn* |
| --- | --- | --- | --- | --- | --- |
| Buffer | 1 | 0.023 | / | 0.061 | 0.916 |
| 2 | 0.093 | / | 0.131 | 0.777 |
| 3 | 0.186 | / | 0.185 | 0.629 |
| 4 | 0.281 | / | 0.219 | 0.501 |
| 5 | 0.367 | / | 0.235 | 0.397 |
| 6 | 0.443 | / | 0.240 | 0.316 |
| 7 | 0.508 | / | 0.238 | 0.254 |
| 8 | 0.562 | / | 0.231 | 0.206 |
| PEG2000 | 1 | 0.033 | / | 0.266 | 0.701 |
| 2 | 0.103 | / | 0.336 | 0.562 |
| 3 | 0.184 | / | 0.358 | 0.459 |
| 4 | 0.265 | / | 0.356 | 0.379 |
| 5 | 0.340 | / | 0.344 | 0.316 |
| 6 | 0.408 | / | 0.326 | 0.266 |
| 7 | 0.467 | / | 0.307 | 0.226 |
| 8 | 0.519 | / | 0.287 | 0.194 |
| PEG4000 | 1 | 0.003 | / | 0.166 | 0.831 |
| 2 | 0.026 | / | 0.227 | 0.747 |
| 3 | 0.081 | / | 0.257 | 0.661 |
| 4 | 0.171 | / | 0.263 | 0.567 |
| 5 | 0.283 | / | 0.249 | 0.469 |
| 6 | 0.400 | / | 0.223 | 0.376 |
| 7 | 0.510 | / | 0.193 | 0.297 |
| 8 | 0.604 | / | 0.164 | 0.232 |
| PEG6000 | 1 | 0.006 | / | 0.118 | 0.877 |
| 2 | 0.038 | / | 0.175 | 0.787 |
| 3 | 0.107 | / | 0.205 | 0.688 |
| 4 | 0.207 | / | 0.213 | 0.581 |
| 5 | 0.321 | / | 0.205 | 0.474 |
| 6 | 0.435 | / | 0.187 | 0.379 |
| 7 | 0.536 | / | 0.165 | 0.299 |
| 8 | 0.621 | / | 0.143 | 0.236 |
| PEG8000 | 1 | 0.006 | / | 0.211 | 0.782 |
| 2 | 0.038 | / | 0.280 | 0.682 |
| 3 | 0.100 | / | 0.309 | 0.590 |
| 4 | 0.188 | / | 0.312 | 0.500 |
| 5 | 0.289 | / | 0.296 | 0.415 |
| 6 | 0.391 | / | 0.270 | 0.339 |
| 7 | 0.485 | / | 0.240 | 0.275 |
| 8 | 0.567 | / | 0.210 | 0.222 |
| PEG20000 | 1 | 0.003 | / | 0.274 | 0.723 |
| 2 | 0.025 | / | 0.327 | 0.648 |
| 3 | 0.078 | / | 0.345 | 0.577 |
| 4 | 0.165 | / | 0.336 | 0.499 |
| 5 | 0.275 | / | 0.308 | 0.416 |
| 6 | 0.393 | / | 0.270 | 0.337 |
| 7 | 0.504 | / | 0.228 | 0.268 |
| 8 | 0.600 | / | 0.190 | 0.211 |
| Dextran20 | 1 | 0.018 | / | 0.150 | 0.831 |
| 2 | 0.070 | / | 0.231 | 0.699 |
| 3 | 0.142 | / | 0.275 | 0.583 |
| 4 | 0.222 | / | 0.293 | 0.485 |
| 5 | 0.301 | / | 0.296 | 0.403 |
| 6 | 0.375 | / | 0.289 | 0.336 |
| 7 | 0.441 | / | 0.277 | 0.282 |
| 8 | 0.499 | / | 0.263 | 0.238 |
| Dextran70 | 1 | 0.002 | / | 0.022 | 0.977 |
| 2 | 0.017 | / | 0.082 | 0.901 |
| 3 | 0.062 | / | 0.161 | 0.778 |
| 4 | 0.136 | / | 0.233 | 0.630 |
| 5 | 0.229 | / | 0.284 | 0.487 |
| 6 | 0.324 | / | 0.309 | 0.367 |
| 7 | 0.412 | / | 0.315 | 0.273 |
| 8 | 0.489 | / | 0.308 | 0.204 |
| Dextran200 | 1 | 0.001 | / | 0.147 | 0.852 |
| 2 | 0.009 | / | 0.245 | 0.746 |
| 3 | 0.037 | / | 0.311 | 0.651 |
| 4 | 0.093 | / | 0.348 | 0.558 |
| 5 | 0.178 | / | 0.357 | 0.465 |
| 6 | 0.282 | / | 0.342 | 0.376 |
| 7 | 0.394 | / | 0.310 | 0.296 |
| 8 | 0.500 | / | 0.272 | 0.229 |
| Ficoll70 | 1 | 0.000 | 0.001 | 0.042 | 0.957 |
| 2 | 0.000 | 0.010 | 0.128 | 0.862 |
| 3 | 0.000 | 0.049 | 0.220 | 0.731 |
| 4 | 0.001 | 0.133 | 0.287 | 0.579 |
| 5 | 0.002 | 0.256 | 0.314 | 0.429 |
| 6 | 0.003 | 0.392 | 0.303 | 0.301 |
| 7 | 0.005 | 0.519 | 0.271 | 0.206 |
| 8 | 0.006 | 0.623 | 0.232 | 0.140 |
| Ficoll400 | 1 | 0.103 | / | / | 0.897 |
| 2 | 0.209 | / | / | 0.791 |
| 3 | 0.301 | / | / | 0.699 |
| 4 | 0.378 | / | / | 0.622 |
| 5 | 0.443 | / | / | 0.557 |
| 6 | 0.498 | / | / | 0.502 |
| 7 | 0.544 | / | / | 0.456 |
| 8 | 0.584 | / | / | 0.416 |
| PL(L-35) | 1 | 0.002 | / | 0.018 | 0.980 |
| 2 | 0.012 | / | 0.059 | 0.929 |
| 3 | 0.028 | / | 0.113 | 0.858 |
| 4 | 0.051 | / | 0.172 | 0.777 |
| 5 | 0.078 | / | 0.229 | 0.693 |
| 6 | 0.107 | / | 0.281 | 0.612 |
| 7 | 0.135 | / | 0.326 | 0.538 |
| 8 | 0.164 | / | 0.364 | 0.472 |
| PL(F-108) | 1 | 0.001 | / | 0.032 | 0.967 |
| 2 | 0.007 | / | 0.077 | 0.917 |
| 3 | 0.017 | / | 0.123 | 0.860 |
| 4 | 0.032 | / | 0.168 | 0.800 |
| 5 | 0.051 | / | 0.210 | 0.740 |
| 6 | 0.073 | / | 0.246 | 0.681 |
| 7 | 0.097 | / | 0.278 | 0.625 |
| 8 | 0.124 | / | 0.304 | 0.573 |
| PL(P-123) | 1 | 0.087 | / | / | 0.913 |
| 2 | 0.191 | / | / | 0.809 |
| 3 | 0.285 | / | / | 0.715 |
| 4 | 0.367 | / | / | 0.633 |
| 5 | 0.437 | / | / | 0.563 |
| 6 | 0.496 | / | / | 0.504 |
| 7 | 0.546 | / | / | 0.454 |
| 8 | 0.589 | / | / | 0.411 |
| PL(L-64) | 1 | 0.006 | / | / | 0.994 |
| 2 | 0.034 | / | / | 0.966 |
| 3 | 0.091 | / | / | 0.909 |
| 4 | 0.173 | / | / | 0.827 |
| 5 | 0.271 | / | / | 0.729 |
| 6 | 0.373 | / | / | 0.627 |
| 7 | 0.470 | / | / | 0.530 |
| 8 | 0.556 | / | / | 0.444 |

**Supplementary S4.***The theoretical model for quantitative analysis of the distribution of stable conformational states during protein unfolding*

Under the influence of the transforming agent molecule, the process by which a natural state enzyme molecule N transitions from the I state to the U state can be expressed as:

In the equation, and represent the thermodynamic equilibrium constants for the transitions from the native state (N) to the intermediate state (I), and from the intermediate state (I) to the unfolded state (U), respectively. The symbol “ ⇌” indicates that the unfolding process of the enzyme is locally reversible. Under the action of denaturant molecules (D), the transition of one enzyme molecule from the native state (N) to the intermediate state (I) can be represented as:

In the equation, m1 represents the number of denaturant molecules bound to one native-state (N) enzyme molecule during the transition. The thermodynamic equilibrium constant () for Equation (M2) can be expressed as:

In the equation, [N], [I], and [D] represent the concentrations (mol/L) of the native-state enzyme, intermediate-state enzyme, and denaturant molecules in the solution, respectively. Under the action of denaturant molecules (D), the further transition of one intermediate-state (I) molecule to the unfolded state (U) can be represented as:

In the equation, m₂ represents the number of denaturant molecules bound to one intermediate-state (I) enzyme molecule during the transition. The thermodynamic equilibrium constant () for Equation (M4) can be expressed as:

In the equation, [U] represents the concentration (mol/L) of unfolded-state enzyme molecules in the solution. From Equation (M3), the following expression can be derived:

By substituting Equation (M6) into Equation (M5) and rearranging, the following expression can be obtained:

During the denaturant-induced unfolding process, the residual activity (*e*) of the enzyme at a given denaturant concentration can be expressed as:

Since the unfolding process of enzyme molecules in urea solution follows a “three-state” sequential transition mechanism, the stable conformational states are generally not evenly distributed at a given denaturant concentration. Instead, the enzyme predominantly exists in one or more specific conformations within certain concentration ranges. The following discussion can be made based on Equation (M8):

(i) When the concentration of denaturant in the solution is relatively low, the enzyme molecules mainly exist in the N and I states, while the concentration of U-state molecules can be neglected. Therefore, Equation (M8) can be simplified as:

Since the residual activity (e) of enzyme molecules can be measured at different denaturant concentrations [D], Equation (M10) indicates that plotting ln(1/e – 1) versus ln[D] should yield a linear relationship, from which the slope and intercept can be used to determine the parameters m₁ and τ₁, respectively.

(ii) When the denaturant concentration in the solution is relatively high, and within a certain concentration range the enzyme molecules mainly exist in the I and U states, while the concentration of N-state molecules can be neglected, then Equation (M8) can be simplified as:

Since the parameters m₁ and τ₁ have already been obtained from Equation (M10), Equation (M12) indicates that plotting ln(1/e – 1) against ln[D] in this concentration range should also yield a linear relationship, from which the slope and intercept can be used to determine the parameters m₂ and τ₂, respectively. In summary, these characteristic unfolding parameters— m₁, m₂, τ1 and τ2—allow for a quantitative description of the distribution of enzyme molecules in different conformational states at various urea concentrations.
